# Supplementary material
Source: ML conference proceedings conference paper supplement (https://openaccess.thecvf.com/content/WACV2024/html/Kulkarni_C2AIR_Consolidated_Compact_WACV_2024_paper.html)
Supplement: Supplementary file 1 [file Kulkarni_C2AIR_Consolidated_Compact_WACV_2024_supplemental.pdf]

# C<sup>2</sup>AIR: Consolidated Compact Aerial Image Haze Removal

## Supplementary Material

Ashutosh Kulkarni, Shruti S. Phutke, Santosh Kumar Vipparthi, and Subrahmanyam Murala

---

### Overview

The supplementary material contains:

- Loss Functions
- Network Architectures Included in Ablation Studies
- More Qualitative Results

## 1 Loss Functions

We train the proposed network using L<sub>1</sub> loss ( $\mathbb{L}_1$ ), and perceptual loss ( $\mathbb{L}_P$ ). The detailed equations of these loss functions are:

### 1.1 L<sub>1</sub> Loss

$\mathbb{L}_1$  loss aims at reduction of the per pixel difference between the output image ( $I_O$ ) and ground truth ( $I_{GT}$ ), which can be formulated as:

$$\mathbb{L}_1 = \|I_O - I_{GT}\|_1 \quad (1)$$

### 1.2 Perceptual Loss

The perceptual loss ( $\mathbb{L}_P$ ) aims at improving the perceptual quality of the output by calculating the differences between output and ground truth at various feature levels. The pretrained layers of VGG-16 [1] model are used as feature space for the loss calculation. The perceptual loss can be represented mathematically as:

$$\mathbb{L}_P = \|\Phi_{i \in \{3,8,15\}}(I_O) - \Phi_{i \in \{3,8,15\}}(I_{GT})\|_1 \quad (2)$$

where,  $\Phi_i(\cdot)$  is  $i^{th}$  layer of VGG-16 model.

## 2 Network Architectures Included in Ablation Studies

Here, we provide the architectural diagrams of each network setting. Figure S 1 represents the network configurations with additive, concatenation-based and without query modulation. Figure S 2 shows the network diagrams of various fusion settings. of the main manuscript. Figure S 3 displays the various types of Feed-Forward blocks.

## 3 More Qualitative Results

We provide more qualitative results on RICE dataset for aerial haze removal in Figure S 4. We compare the qualitative results with state-of-the-art methods USID [2], MSBDN [3], TSDNet [4], RefineDNet [5], SPA-GAN [6], UFormer [7] and AIDNet [8]. Further, in Figure S 5, we provide the qualitative results in comparison with existing state-of-the-art methods TACL [9] and CLUIE [10] for underwater image enhancement on UIEB dataset. As seen from the results, the proposed method is able to maintain more spatial content and color balance.

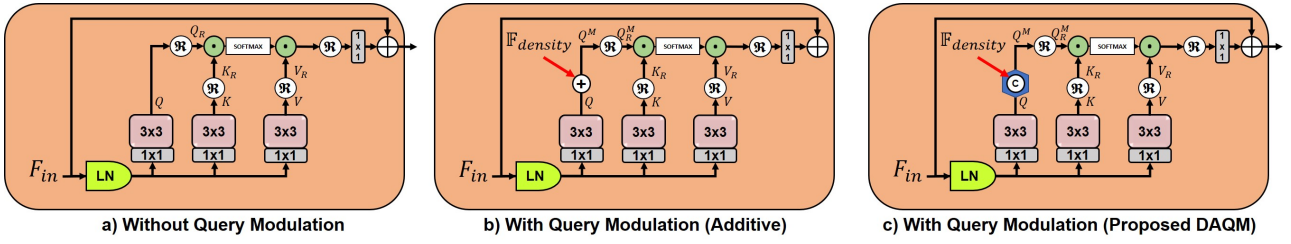

Figure S 1: Network architectures of different types of query modulation mechanisms considered in the ablation study.

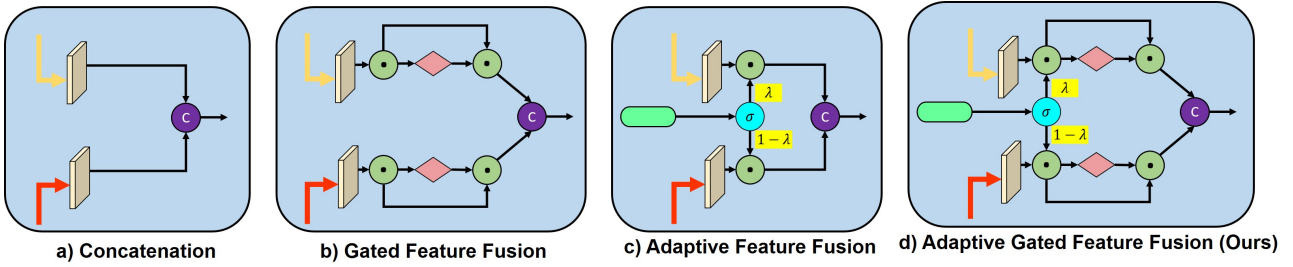

Figure S 2: Network architectures of different types of fusion mechanisms considered in the ablation study.

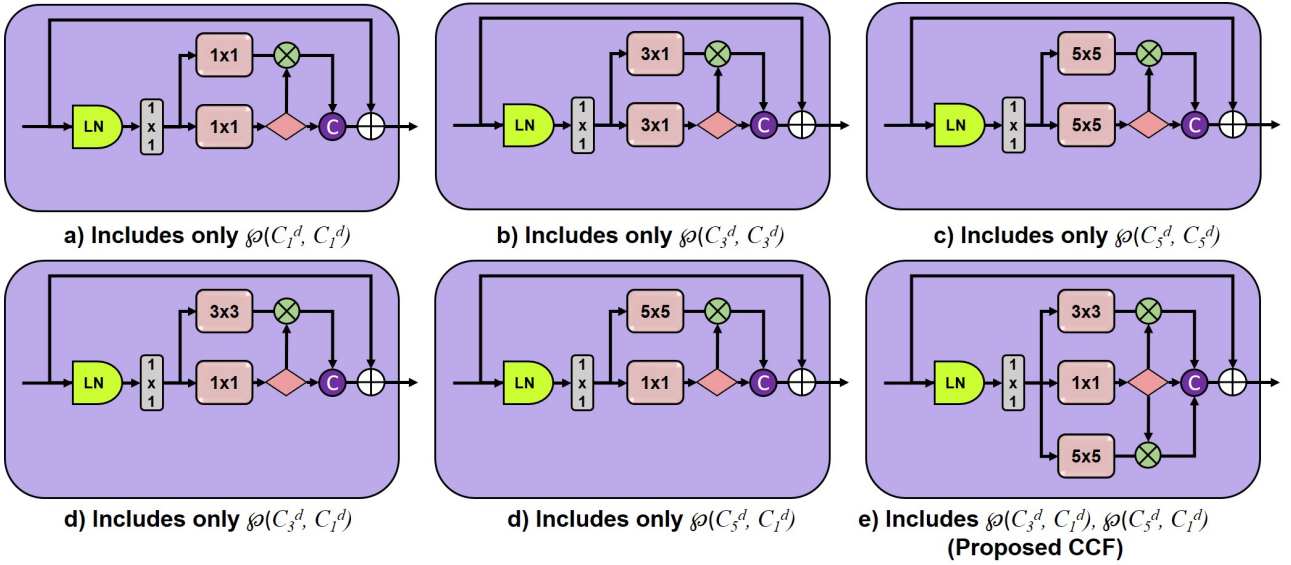

Figure S 3: Network architectures of different types of Feed-Forward blocks considered in the ablation study.

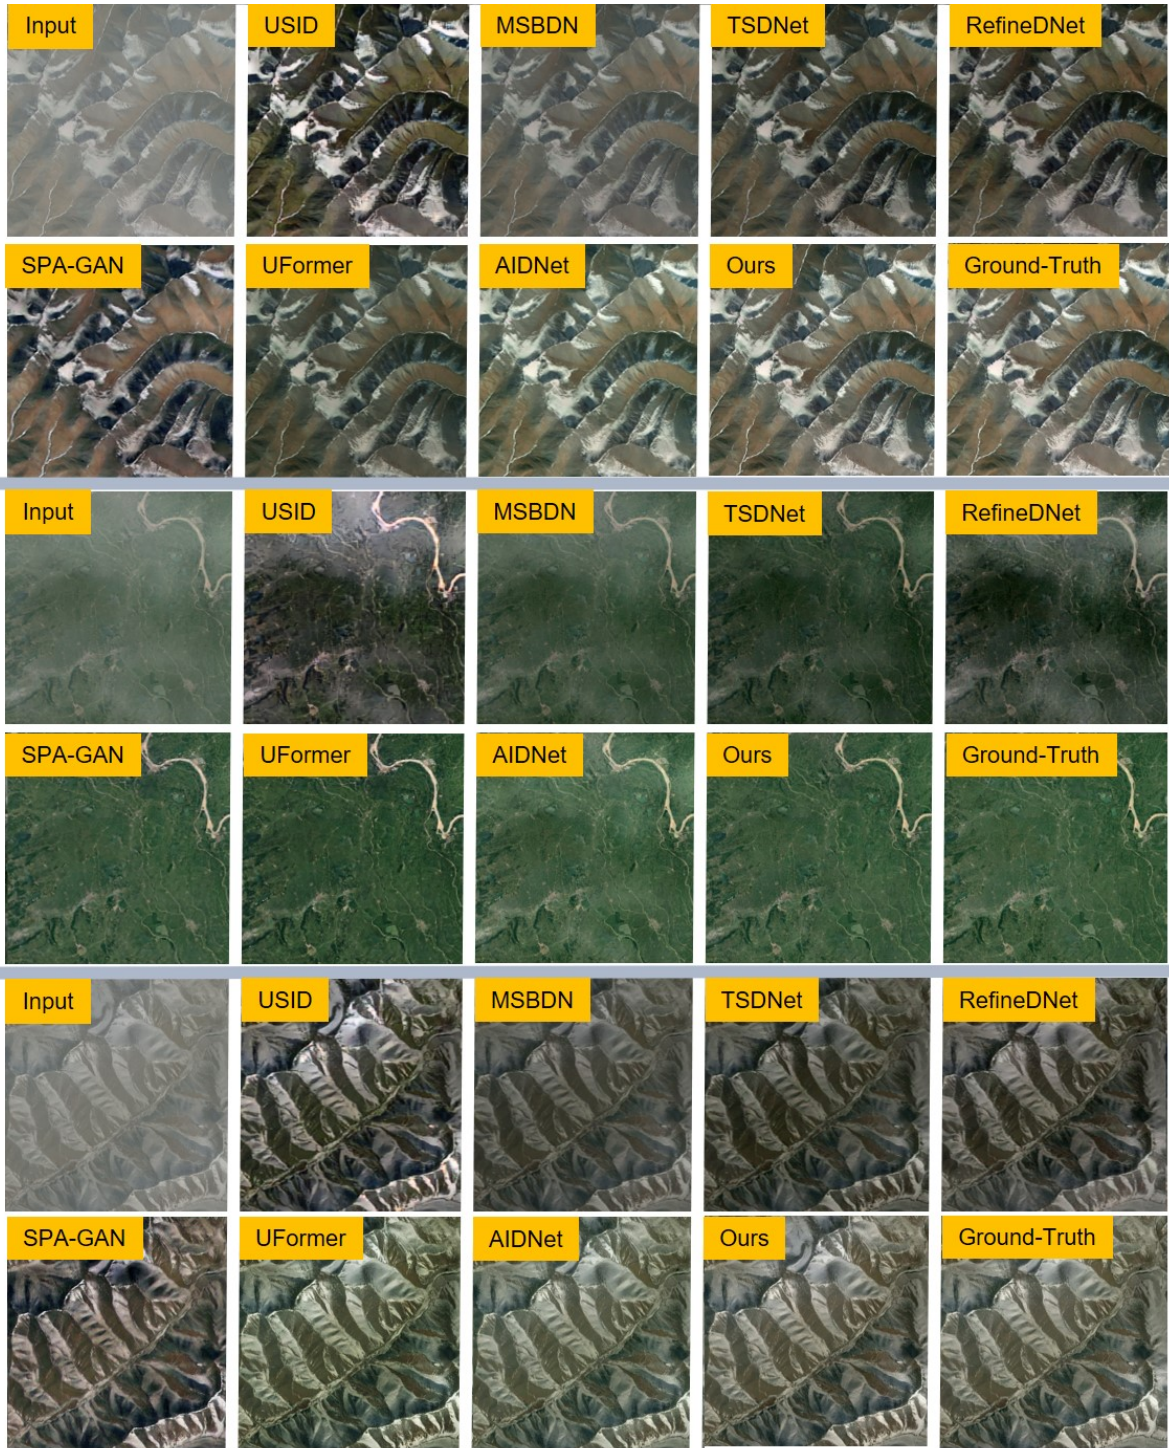

Figure S 4: Qualitative results comparison with existing state-of-the-art methods on RICE dataset for aerial image dehazing.

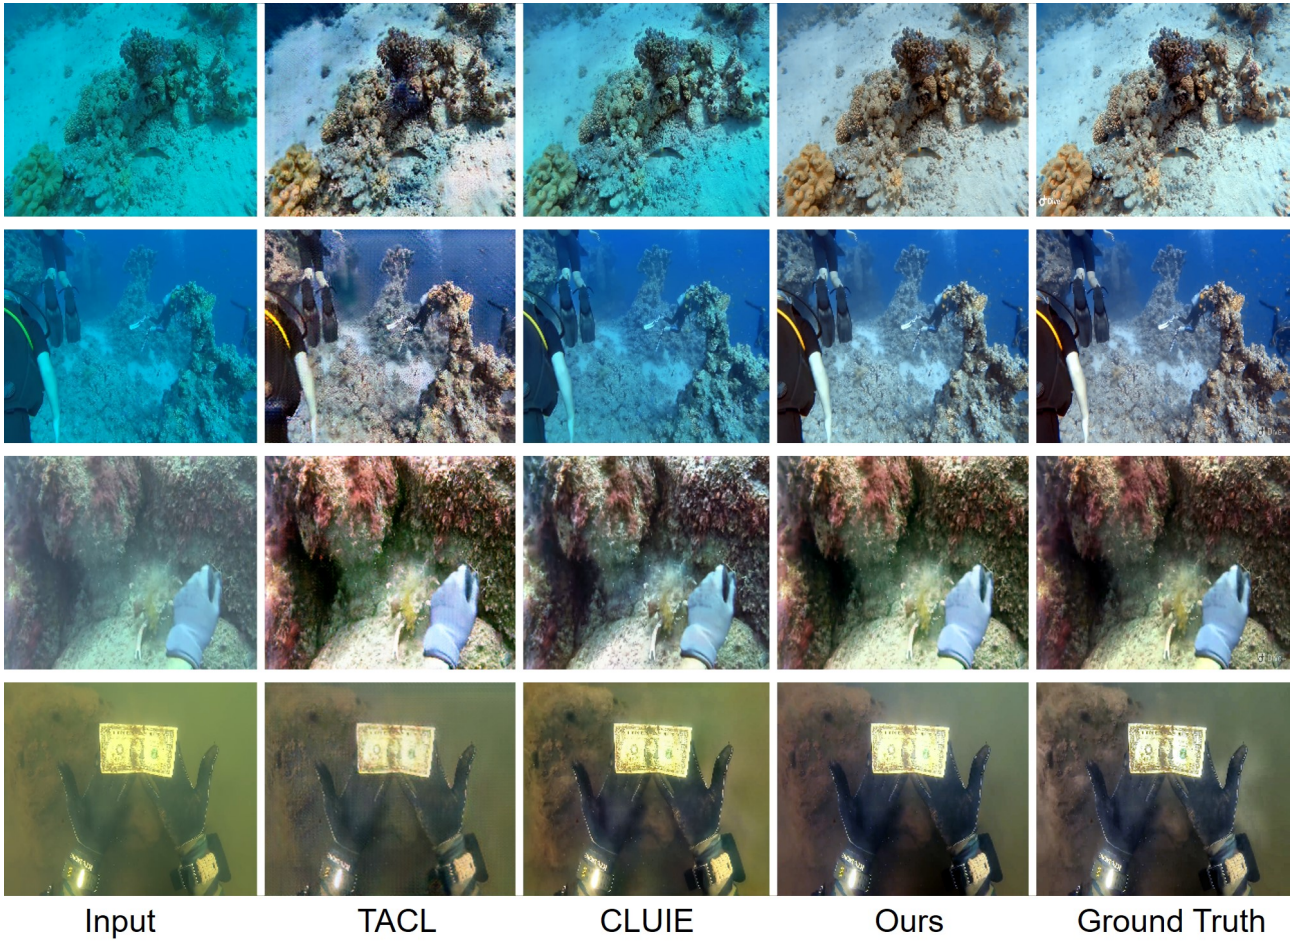

Figure S 5: Qualitative results comparison with existing state-of-the-art methods on the UIEB dataset for underwater image enhancement.

## References

- [1] K. Simonyan and A. Zisserman, “Very deep convolutional networks for large-scale image recognition,” *arXiv preprint arXiv:1409.1556*, 2014.
- [2] J. Li, Y. Li, L. Zhuo, L. Kuang, and T. Yu, “Usid-net: Unsupervised single image dehazing network via disentangled representations,” *IEEE Transactions on Multimedia*, pp. 1–1, 2022.
- [3] H. Dong, J. Pan, L. Xiang, Z. Hu, X. Zhang, F. Wang, and M.-H. Yang, “Multi-scale boosted dehazing network with dense feature fusion,” in *Proceedings of the IEEE/CVF conference on computer vision and pattern recognition*, 2020, pp. 2157–2167.
- [4] R. W. Liu, Y. Guo, Y. Lu, K. T. Chui, and B. B. Gupta, “Deep network-enabled haze visibility enhancement for visual iot-driven intelligent transportation systems,” *IEEE Transactions on Industrial Informatics*, pp. 1–1, 2022.
- [5] S. Zhao, L. Zhang, Y. Shen, and Y. Zhou, “Refinednet: A weakly supervised refinement framework for single image dehazing,” *IEEE Transactions on Image Processing*, vol. 30, pp. 3391–3404, 2021.
- [6] H. Pan, “Cloud removal for remote sensing imagery via spatial attention generative adversarial network,” *arXiv preprint arXiv:2009.13015*, 2020.
- [7] Z. Wang, X. Cun, J. Bao, W. Zhou, J. Liu, and H. Li, “Uformer: A general u-shaped transformer for image restoration,” in *Proceedings of the IEEE/CVF Conference on Computer Vision and Pattern Recognition (CVPR)*, June 2022, pp. 17 683–17 693.
- [8] A. Kulkarni and S. Murala, “Aerial image dehazing with attentive deformable transformers,” in *Proceedings of the IEEE/CVF Winter Conference on Applications of Computer Vision*, 2023, pp. 6305–6314.
- [9] R. Liu, Z. Jiang, S. Yang, and X. Fan, “Twin adversarial contrastive learning for underwater image enhancement and beyond,” *IEEE Transactions on Image Processing*, vol. 31, pp. 4922–4936, 2022.
- [10] K. Li, L. Wu, Q. Qi, W. Liu, X. Gao, L. Zhou, and D. Song, “Beyond single reference for training: underwater image enhancement via comparative learning,” *IEEE Transactions on Circuits and Systems for Video Technology*, 2022.
